# Supplementary material for: Comparison of Nutrition Indices for Prognostic Utility in Patients with Sepsis: A Real-World Observational Study
Source: MDPI journal article supplement (doi:10.3390/diagnostics13071302), 2023-03-30

Supplementary Figure S1 Non-linear cubic spline curve of nutrition indexes against mortality in sepsis between non-ICU group and ICU group.

Supple. S1A GNRI (left: non-ICU, right: ICU)

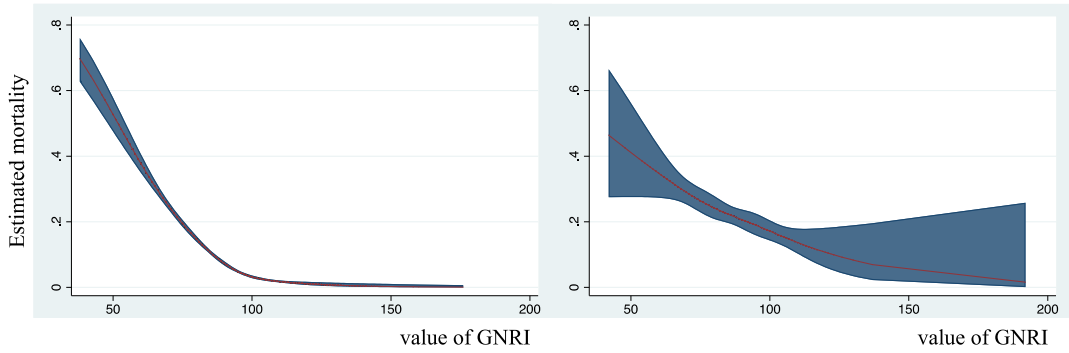

Supple. S1B PNI (left: non-ICU, right: ICU)

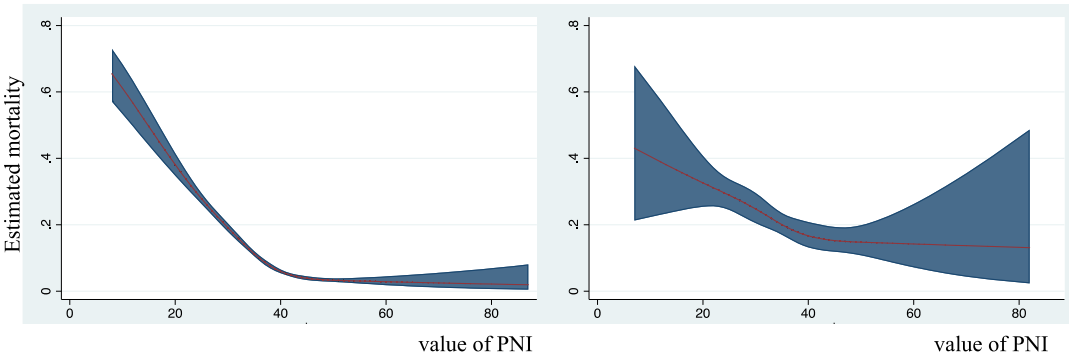

Supple. S1C CONUT (left: non-ICU, right: ICU)

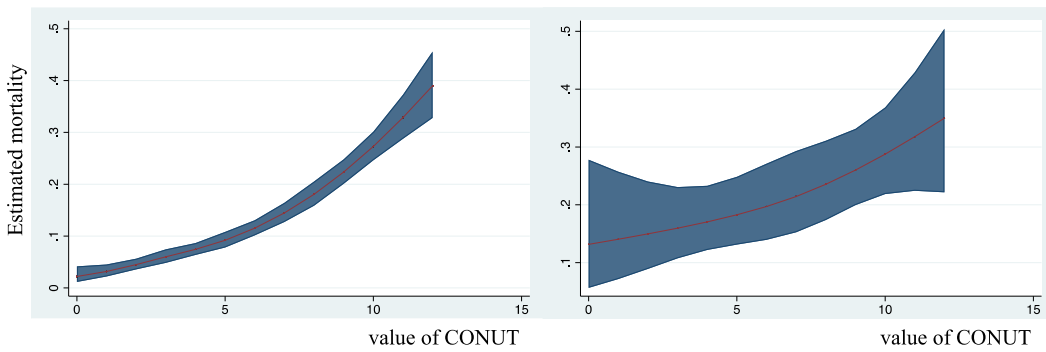

Supplement: s1 [file s1]
